# Supplementary material for: Expression of claudin‐18.2 in cholangiocarcinoma: a comprehensive immunohistochemical analysis from a German tertiary centre
Source: PubMed Central journal article supplement (PMC11791722; doi:10.1111/his.15407), 2024-12-27
Supplement: HIS-86-640-s001.pdf [file HIS-86-640-s001.pdf]

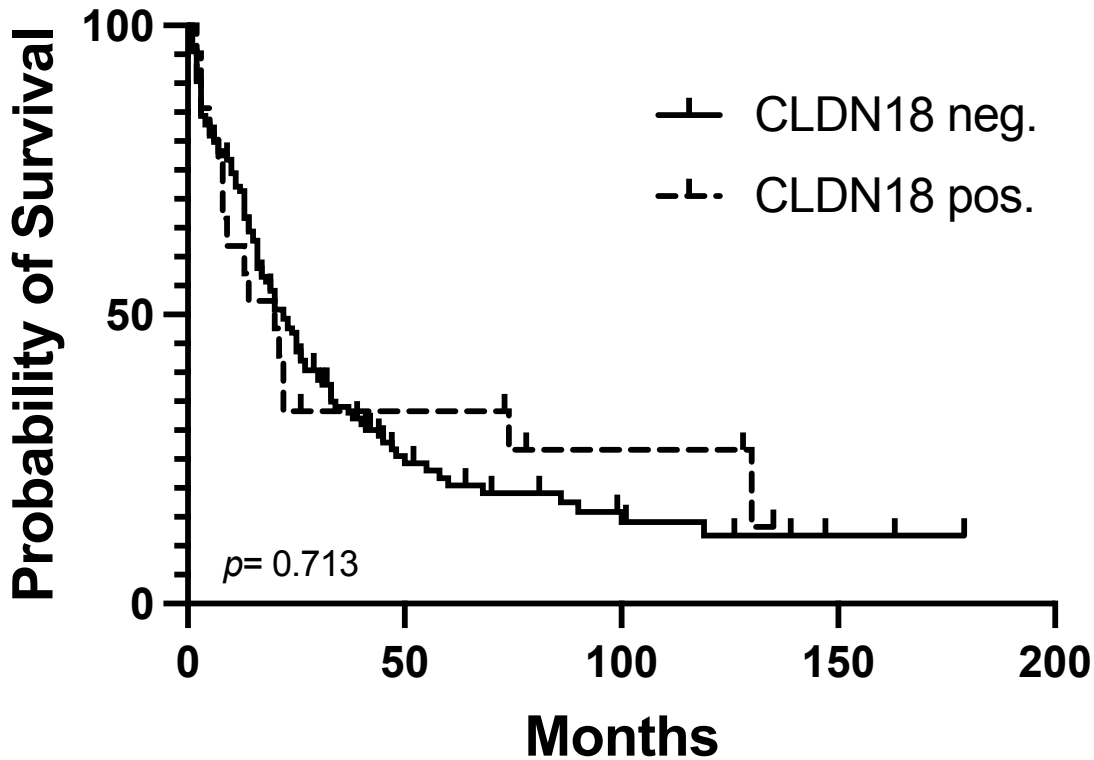

Number at risk

CLDN18 neg. 139

20

8

2

0

CLDN18 pos. 21

6

3

0

0
