# Supplementary material for: Expression of claudin‐18.2 in cholangiocarcinoma: a comprehensive immunohistochemical analysis from a German tertiary centre
Source: PubMed Central journal article supplement (PMC11791722; doi:10.1111/his.15407), 2024-12-27
Supplement: HIS-86-640-s002.pdf [file HIS-86-640-s002.pdf]

**A****CLDN18 neg.**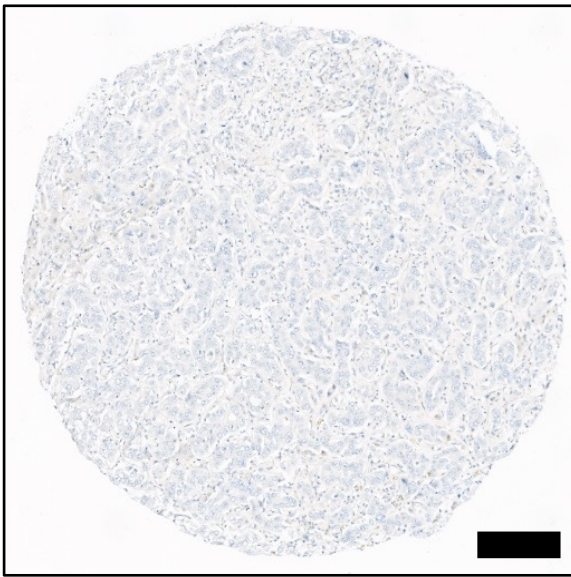

TMA core

**CLDN18 neg.**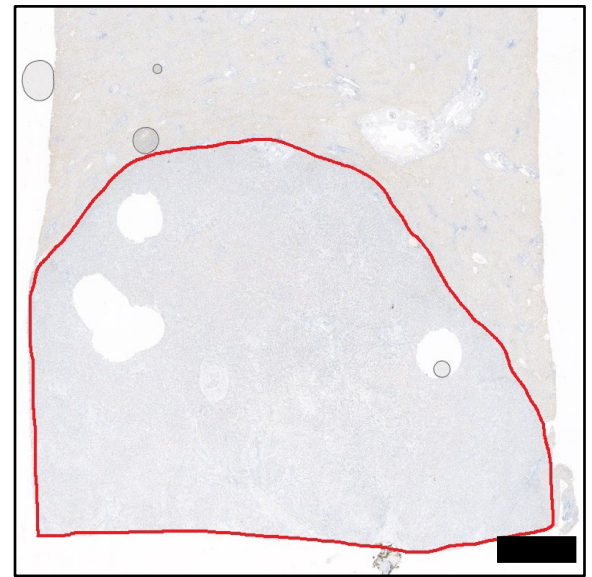

Whole slide

**B****CLDN18 low**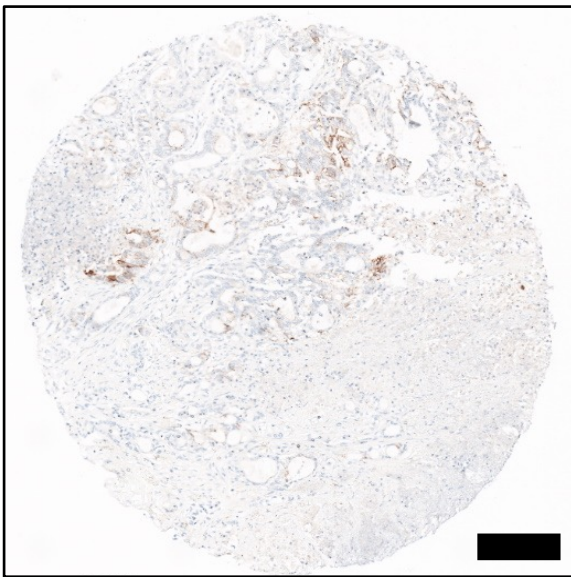

TMA core

**CLDN18 low**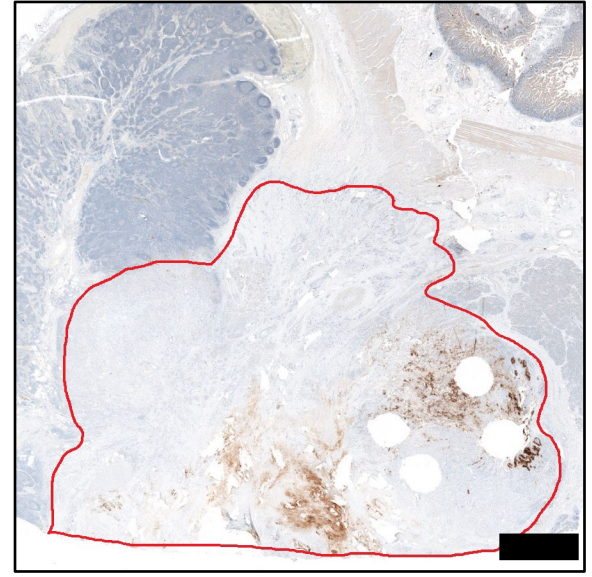

Whole slide

**C****CLDN18 strong**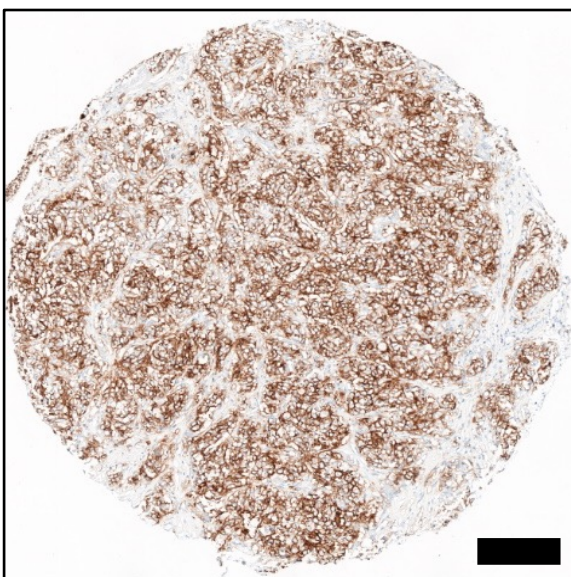

TMA core

**CLDN18 strong**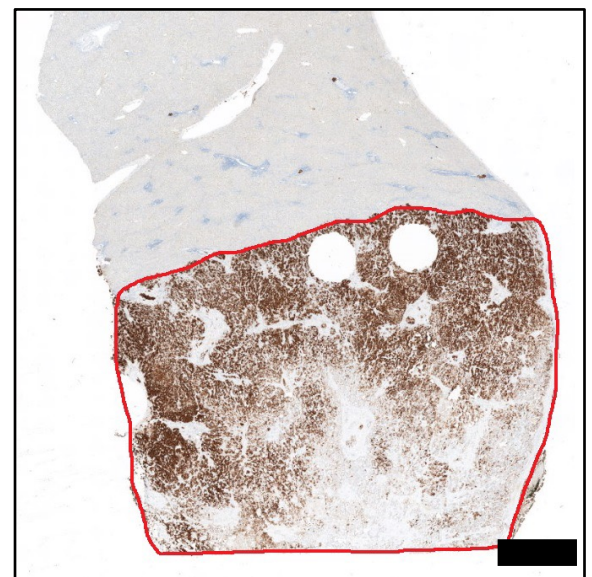

Whole slide
