# Supplementary material for: Expression of claudin‐18.2 in cholangiocarcinoma: a comprehensive immunohistochemical analysis from a German tertiary centre
Source: PubMed Central journal article supplement (PMC11791722; doi:10.1111/his.15407), 2024-12-27

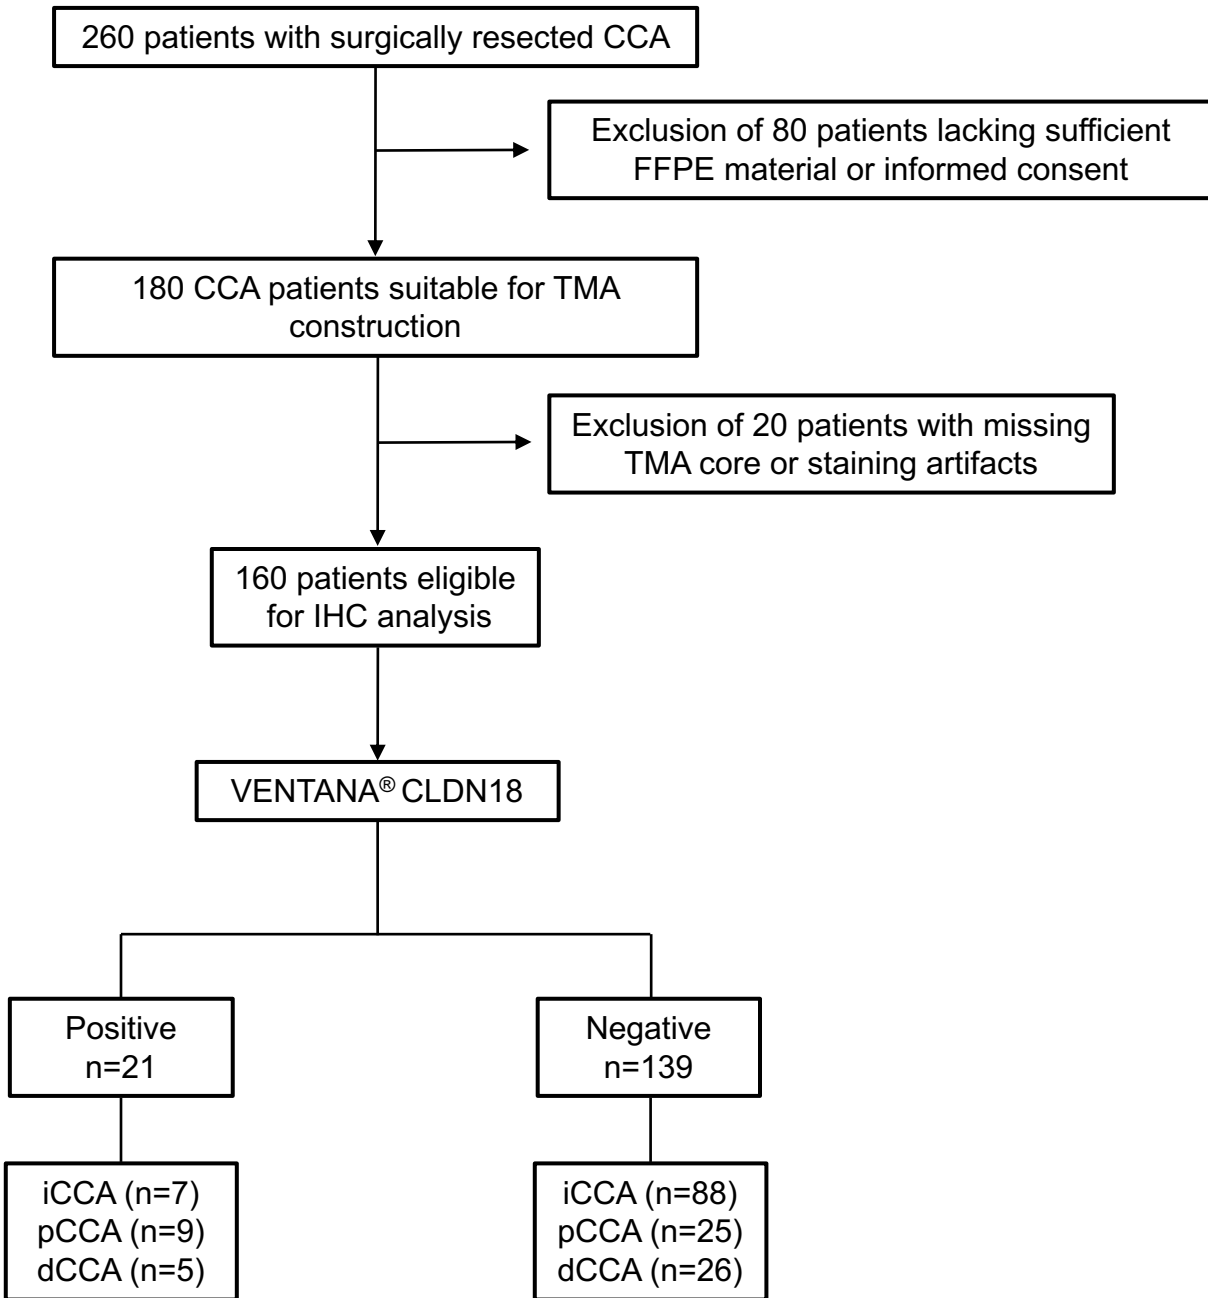

Supplement: HIS-86-640-s003.pdf [file HIS-86-640-s003.pdf]
