# Supplementary material for: Expression of claudin‐18.2 in cholangiocarcinoma: a comprehensive immunohistochemical analysis from a German tertiary centre
Source: PubMed Central journal article supplement (PMC11791722; doi:10.1111/his.15407), 2024-12-27
Supplement: HIS-86-640-s004.pdf [file HIS-86-640-s004.pdf]

**Suppl. Table 1.**

| Characteristics                 | VENTANA® CLDN18               |                                | p-Value |
|---------------------------------|-------------------------------|--------------------------------|---------|
|                                 | Positive<br>(n=21)<br>No. (%) | Negative<br>(n=139)<br>No. (%) |         |
| <b>Sex</b>                      |                               |                                | 0.421   |
| Female                          | 9 (42.9)                      | 47 (33.8)                      |         |
| Male                            | 12 (57.1)                     | 92 (66.2)                      |         |
| <b>Age at initial diagnosis</b> |                               |                                | 0.777   |
| Mean, years, (range)            | 65.9 (42-82)                  | 65.2 (38-86)                   |         |
| <b>ECOG</b>                     |                               |                                | 0.088   |
| 0                               | 10 (47.6)                     | 94 (67.6)                      |         |
| 1                               | 10 (47.6)                     | 41 (29.5)                      |         |
| 2                               | 1 (4.8)                       | 4 (2.9)                        |         |
| <b>CA-19/9 (ng/ml)</b>          |                               |                                | 0.282   |
| < 37                            | 4 (19)                        | 49 (35.3)                      |         |
| ≥ 37                            | 10 (47.6)                     | 63 (45.3)                      |         |
| n.a.                            | 7 (33.3)                      | 27 (19.4)                      |         |
| <b>Tumor size (cm)</b>          |                               |                                | 0.23    |
| ≤ 5                             | 15 (71.4)                     | 80 (57.6)                      |         |
| > 5                             | 6 (28.6)                      | 59 (42.4)                      |         |
| <b>Single Tumor</b>             |                               |                                | 0.277   |
| Yes                             | 16 (76.2)                     | 89 (64)                        |         |
| No                              | 5 (23.8)                      | 50 (36)                        |         |
| <b>Pathological grade</b>       |                               |                                | 0.903   |
| Grade 1                         | 1 (4.8)                       | 2 (1.4)                        |         |
| Grade 2                         | 14 (66.7)                     | 100 (71.9)                     |         |
| Grade 3                         | 6 (28.6)                      | 37 (26.6)                      |         |
| <b>M status</b>                 |                               |                                | 0.002   |
| M0                              | 16 (76.2)                     | 132 (95)                       |         |
| M1                              | 5 (23.8)                      | 7 (5)                          |         |
| <b>LNM</b>                      |                               |                                | 0.008   |
| No                              | 9 (42.9)                      | 90 (64.7)                      |         |
| Regional                        | 8 (38.1)                      | 44 (31.7)                      |         |
| Distant                         | 4 (19)                        | 5 (3.6)                        |         |
| <b>R status</b>                 |                               |                                | 0.207   |
| R0                              | 14 (66.7)                     | 106 (76.3)                     |         |
| R1                              | 7 (33.3)                      | 28 (20.1)                      |         |
| Rx                              | 0 (0)                         | 5 (3.6)                        |         |
| <b>L status</b>                 |                               |                                | 0.466   |
| L0                              | 9 (42.9)                      | 66 (47.5)                      |         |
| L1                              | 10 (47.6)                     | 51 (36.7)                      |         |
| Lx                              | 2 (9.5)                       | 22 (15.8)                      |         |
| <b>Pn status</b>                |                               |                                | 0.022   |
| Pn0                             | 2 (9.5)                       | 43 (30.9)                      |         |
| Pn1                             | 17 (81)                       | 72 (51.8)                      |         |
| Pnx                             | 2 (9.5)                       | 24 (17.3)                      |         |
| <b>V status</b>                 |                               |                                | 0.512   |
| V0                              | 14 (66.7)                     | 100 (71.9)                     |         |
| V1                              | 4 (19)                        | 19 (13.7)                      |         |
| Vx                              | 3 (14.3)                      | 20 (14.4)                      |         |
| <b>Recurrence</b>               |                               |                                | 0.709   |

|                        |           |            |       |
|------------------------|-----------|------------|-------|
| Yes                    | 13 (61.9) | 80 (57.6)  |       |
| No                     | 8 (38.1)  | 59 (42.4)  |       |
| <b>Cholelithiasis</b>  |           |            | 0.065 |
| Yes                    | 3 (14.3)  | 6 (4.3)    |       |
| No                     | 18 (85.7) | 133 (95.7) |       |
| <b>PSC</b>             |           |            | 0.335 |
| Yes                    | 0 (0)     | 6 (4.3)    |       |
| No                     | 21 (100)  | 133 (95.7) |       |
| <b>Viral hepatitis</b> |           |            | 0.491 |
| Yes                    | 1 (4.8)   | 13 (9.4)   |       |
| No                     | 20 (95.2) | 126 (90.6) |       |
| <b>Diabetes</b>        |           |            | 0.528 |
| Yes                    | 6 (28.6)  | 31 (22.3)  |       |
| No                     | 15 (71.4) | 108 (77.7) |       |
| <b>Liver cirrhosis</b> |           |            | 0.335 |
| Yes                    | 0 (0)     | 6 (4.3)    |       |
| No                     | 21 (100)  | 133 (95.7) |       |
| <b>LDH</b>             |           |            |       |
| < 248                  | 13 (61.9) | 69 (49.6)  | 0.036 |
| ≥ 248                  | 1 (4.8)   | 37 (26.6)  |       |
| n.a.                   | 7 (33.3)  | 33 (23.7)  |       |
| <b>Bilirubin</b>       |           |            | 0.573 |
| < 1.4                  | 13 (61.9) | 92 (66.2)  |       |
| ≥ 1.4                  | 8 (38.1)  | 43 (30.9)  |       |
| n.a.                   | 0 (0)     | 4 (2.9)    |       |

---
